# Supplementary material for: Cemented injectable multi-phased porous bone grafts for the treatment of femoral head necrosis
Source: Royal Society of Chemistry journal article supplement (doi:10.1039/c9tb00238c), 2019-01-01
Supplement: c9tb00238c1.pdf [file c9tb00238c1.pdf]

## Supporting Information

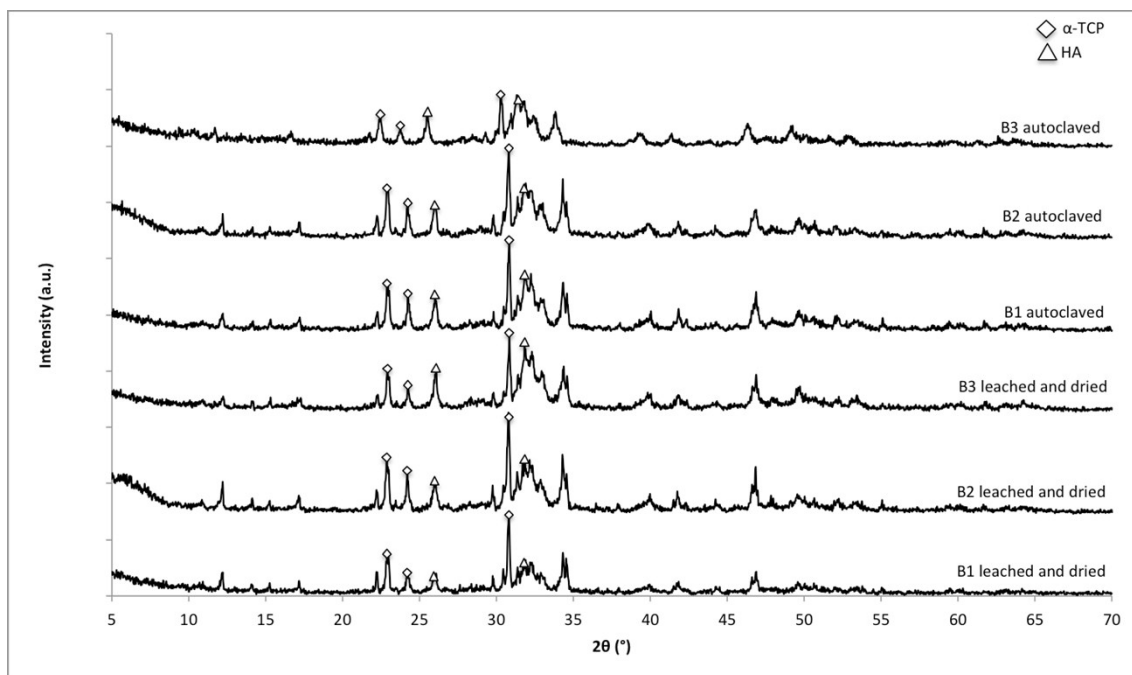

Figure S1 XRD patterns of Granule B: 3 bathes of dried and autoclaved

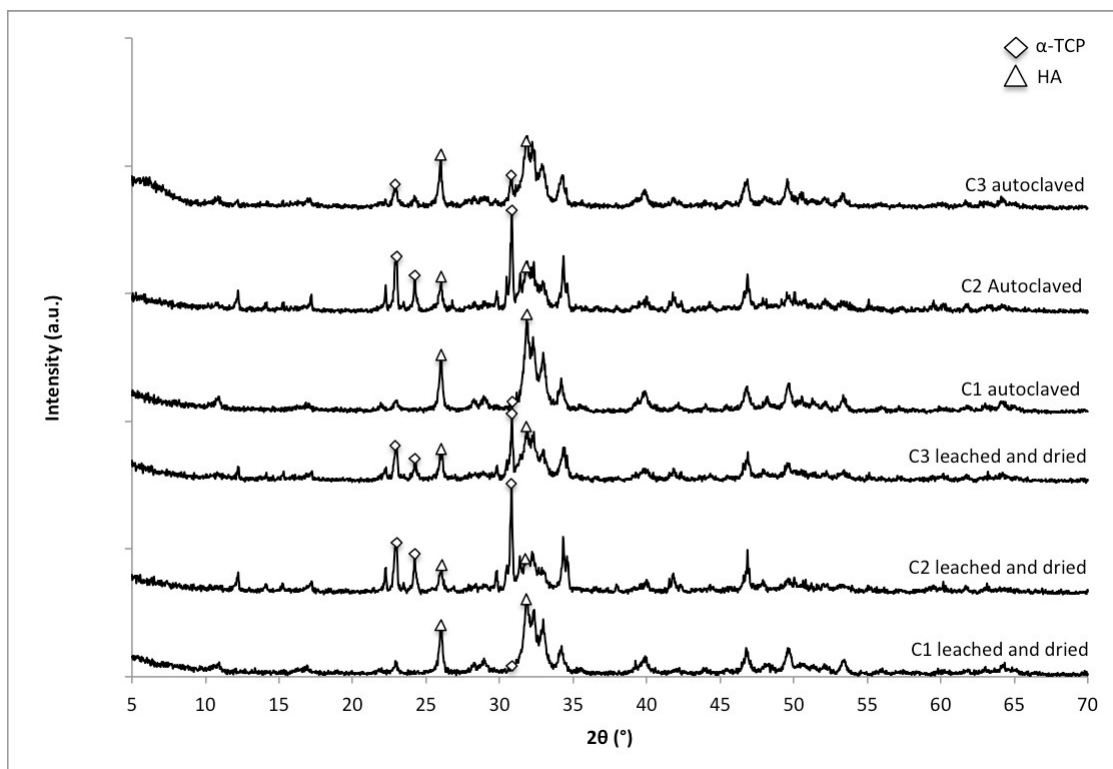

Figure S2 XRD patterns of Granule C: 3 bathes of dried and autoclaved
